# Supplementary material
Source: publisher figshare collection journal article supplement (https://diabetesjournals.figshare.com/articles/dataset/_/19723336)
Supplement: Supplementary file 1 [file 1]

SUPPLEMENTARY INFORMATION

SUPPLEMENTARY FIGURE 1

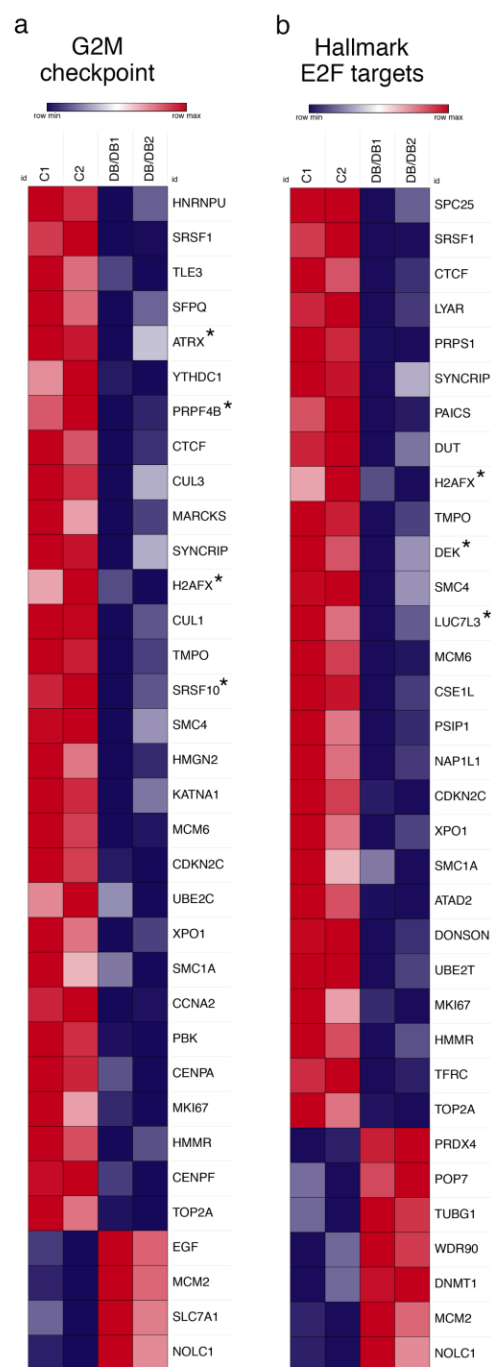

\* Genes identified as YY1 targets in the Chip-seq that were also differentially expressed in the db/db mice.

**Supplementary figure 1 - RNAseq gene expression from control and db/db mice.** Genes involved in the G2M checkpoint pathway (**A**) and hallmark E2F2 targets (**B**) in control and db/db mice.

## SUPPLEMENTARY METHODS

*Table 1 - Reagents used in this study*

| Reagent                                                      | Company            | Catalog #     |
|--------------------------------------------------------------|--------------------|---------------|
| High fat diet (60% fat, 20% protein, 20% carbohydrate kcal%) | Open Source Diet   | D12492        |
| L-Glutamine                                                  | Gibco              | 21875         |
| foetal bovine serum                                          | Gibco              | 10106-151     |
| 100U/ml penicillin and 0.1g/L streptomycin antibiotics       | Gibco              | 15070063      |
| Direct-zol RNA Microprep Plus                                | Zymo Research      | R2061         |
| SMARTer Stranded RNAseq Kit                                  | Clontech           | 634839        |
| cOmplete™, Mini, EDTA-free Protease Inhibitor                | Roche              | 4693159001    |
| PhosSTOP™                                                    | Sigma Aldrich      | 4906845001    |
| Accel-NGS™ 2S Plus DNA Library Kit                           | Swift Biosciences  | 66096         |
| mouse ultrasensitive specific ELISA                          | ALPCO              | 80-INSMSU-E01 |
| Rabbit IRDye® 680RD                                          | Li-cor             | 929-70050     |
| Mouse IRDye® 800CW                                           | Li-cor             | 929-70020     |
| High-Capacity cDNA Reverse Transcription Kit                 | Applied biosystems | 4368813       |
| power SYBR® green master mix                                 | Applied biosystems | 4368577       |
| Blocking buffer                                              | Li-cor             | 927-60001     |
| RPMI 1640                                                    | Corning Cellgro    | 10-040-cv     |

***Supplemental Table 2 - Primer sequences used in Rip-βYY1KO***

| <b>Gene</b> | <b>Forward (5` - 3`)</b>   | <b>Reverse (5` - 3`)</b>   |
|-------------|----------------------------|----------------------------|
| YY1         | ACCTGGCATTGACCTCTCAGAC     | CTCATAGCAGAGTTATCCCTGAAC   |
| Glut2       | GTTGGAAGAGGAAGTCAGGGCA     | ATCACGGAGACCTTCTGCTCAG     |
| Ins1        | AGGACCCACAAGTGGAACAAC      | GTGCAGCACTGATCCACAATG      |
| Ins2        | GCTCTCTACCTGGTGTGTGGG      | CTCCACCCAGCTCCAGTTGTG      |
| Arx         | CTGCTGAAGCGCAAACAGAGGC     | CTCTGTCAGGTCCAGCCTCATG     |
| Nkx6.1      | GGAAGTGTGCTGGGCAGACACAG    | AAGGTAGGGCGGGTGTGCTTTT     |
| Pdx1        | AGG TGC TTA CAC AGC GGA AC | GGG TCC CGC TAC TAC GTT TC |

***Supplemental Table 3 - Primer sequences used in Ins1- $\beta$ YY1KO***

| <b>Gene</b> | <b>Forward (5' - 3')</b> | <b>Reverse (5' - 3')</b> |
|-------------|--------------------------|--------------------------|
| Ins2        | GCAAGCAGGAAGGTTATTGTTTCA | GCTTGACAAAAGCCTGGGTG     |
| Glut2       | CGGTCTACGGCTCTGGCACTG    | CACCCCAGCGAAGAGGAAGAA    |
| Pdx1        | TGGGCAGGAGGTGCTTACA      | TCATGCGACGGTTTTGGAAC     |

***Table 4- Antibodies used in immunofluorescence staining***

| <b>Target</b>  | <b>Company</b> | <b>Catalog #</b> | <b>Dilution</b> |
|----------------|----------------|------------------|-----------------|
| Anti-insulin   | DAKO           | A0564            | 1:400           |
| Anti-YY1       | Santa Cruz     | Sc-7341          | 1:75            |
| Anti-Ki67      | Thermo         | PA5-19462        | 1:1000          |
| Anti-p-H2AX    | Abcam          | Ab81299          | 1:250           |
| Anti-Nkx6.1    | DSHB           | F55A10           | 1:100           |
| Anti-GLUT2     | Millipore      | 07-1402-1        | 1:100           |
| Anti-Cyclin A2 | Abcam          | ab32386          | 1:200           |

***Table 5 - Antibodies used in wester blotting***

| <b>Target</b> | <b>Company</b> | <b>Catalog #</b> | <b>Dilution</b> |
|---------------|----------------|------------------|-----------------|
| Anti-YY1      | Sigma Aldrich  | PLA0268          | 1:2000          |
| Anti-tubulin  | Sigma Aldrich  | T5168            | 1:2000          |
