# Supplementary material
Source: publisher figshare collection journal article supplement (https://diabetesjournals.figshare.com/articles/dataset/_/19723336)
Supplement: Supplementary file 2 [file 1]

## Checklist for Reporting Human Islet Preparations Used in Research

Adapted from Hart NJ, Powers AC (2018) Progress, challenges, and suggestions for using human islets to understand islet biology and human diabetes. Diabetologia <https://doi.org/10.1007/s00125-018-4772-2>.

|                                                                                                                                                                                                        |                                             |
|--------------------------------------------------------------------------------------------------------------------------------------------------------------------------------------------------------|---------------------------------------------|
| <b>Manuscript DOI:</b> <a href="https://doi.org/10.2337/DB21-0908">https://doi.org/10.2337/DB21-0908</a> (Example, <a href="https://doi.org/10.2337/db18-1234">https://doi.org/10.2337/db18-1234</a> ) |                                             |
| <b>Title:</b> The transcription factor YY1 is essential for normal DNA repair and cell cycle in human and mouse $\beta$ -cells                                                                         |                                             |
| <b>Author list:</b> Flavia Letícia Martins Peçanha, Rami Jaafar, Joao Pedro Werneck-de-Castro, Charalampia-Christina Apostolopolou, Anil Bhushan and Ernesto Bernal-Mizrachi                           |                                             |
| <b>Corresponding author:</b> Ernesto Bernal-Mizrachi                                                                                                                                                   | <b>Email address:</b> ebernal@med.miami.edu |

| Islet preparation                                                 | 1          | 2          | 3      | 4              | 5            | 6           |
|-------------------------------------------------------------------|------------|------------|--------|----------------|--------------|-------------|
| MANDATORY INFORMATION                                             |            |            |        |                |              |             |
| Unique identifier                                                 | HIP1530601 | HIP1530901 | RHIP96 | HP-15268-01T2D | HP1602301T2D | RHIP100 T2D |
| Donor age (years)                                                 | 41         | 32         | 40     | 55             | 51           | 53          |
| Donor sex (M/F)                                                   | F          | M          | F      | F              | M            | M           |
| Donor BMI (kg/m <sup>2</sup> )                                    | 23.56      | 31.32      | 15.4   | 29.84          | 24.47        | 29.6        |
| Donor HbA <sub>1c</sub> or other measure of blood glucose control | 5.6        | 5.1        | 5.4    | 7.4            | 6.9          | 13.3        |

|                                                        |                        |                        |                     |                        |                        |                                               |
|--------------------------------------------------------|------------------------|------------------------|---------------------|------------------------|------------------------|-----------------------------------------------|
| Origin/source of islets <sup>b</sup>                   | Prodo Laboratories INC | Prodo Laboratories INC | UCSF Islet Core     | Prodo Laboratories INC | Prodo Laboratories INC | UCSF Islet Core                               |
| Islet isolation centre                                 | Prodo Laboratories INC | Prodo Laboratories INC | UCSF                | Prodo Laboratories INC | Prodo Laboratories INC | UCSF                                          |
| Donor history of diabetes? Yes/No                      | No                     | No                     | Yes                 | Yes                    | Yes                    | Yes                                           |
| Diabetes duration (years)                              | NA                     | NA                     | 0-5 yrs Gestational | NA                     | NA                     | Undiagnosed diabetes. 1 month prior to death. |
| Glucose-lowering therapy at time of death <sup>c</sup> | NA                     | NA                     | NA                  | NA                     | NA                     | Humulin N                                     |

| RECOMMENDED INFORMATION |                     |                         |                        |                                |            |                         |
|-------------------------|---------------------|-------------------------|------------------------|--------------------------------|------------|-------------------------|
| Donor cause of death    | CVA/ Natural Causes | Gunshot Wound/ Homicide | Anoxia/ Cardiovascular | Cardiovascular/ Natural Causes | ICH/Stroke | Cerebrovascular /stroke |
| Warm ischaemia time (h) | NA                  | NA                      | 45 minutes             | NA                             | NA         | none                    |
| Cold ischaemia time (h) | NA                  | NA                      | 6hr: 48min             | NA                             | NA         | 8hr: 20min              |
| Estimated purity (%)    | 90%                 | 95%                     | 95%                    | 90-95%                         | 90%        | 90%                     |
| Estimated viability (%) | 95%                 | 95%                     | 99.4%                  | 95%                            | 95%        | 97%                     |

|                                                                                   |    |    |                                                                               |    |    |                                                                              |
|-----------------------------------------------------------------------------------|----|----|-------------------------------------------------------------------------------|----|----|------------------------------------------------------------------------------|
| Total culture time (h) <sup>d</sup>                                               | na | na | placed in culture at 01:00 pst on 10/14/16. When did you run your experiment? | na | na | placed in Culture at 15:00 pst on 2/14/16. When did you run your experiment? |
| Glucose-stimulated insulin secretion or other functional measurement <sup>e</sup> | na | na | 2.28                                                                          | na | na | 2.66                                                                         |
| Handpicked to purity? Yes/No                                                      |    |    | No                                                                            |    |    | No                                                                           |
| Additional notes                                                                  | na | na |                                                                               | na | na |                                                                              |

<sup>a</sup>If you have used more than eight islet preparations, please complete additional forms as necessary

<sup>b</sup>For example, IIDP, ECIT, Alberta IsletCore

<sup>c</sup>Please specify the therapy/therapies

<sup>d</sup>Time of islet culture at the isolation centre, during shipment and at the receiving laboratory

<sup>e</sup>Please specify the test and the results
